# Supplementary material for: General synthesis of metal oxide hollow core–shell microspheres as anode materials for lithium-ion batteries and as adsorbents for wastewater treatment
Source: Royal Society of Chemistry journal article supplement (doi:10.1039/c6ce02563c), 2017-01-01
Supplement: c6ce02563c1.pdf [file c6ce02563c1.pdf]

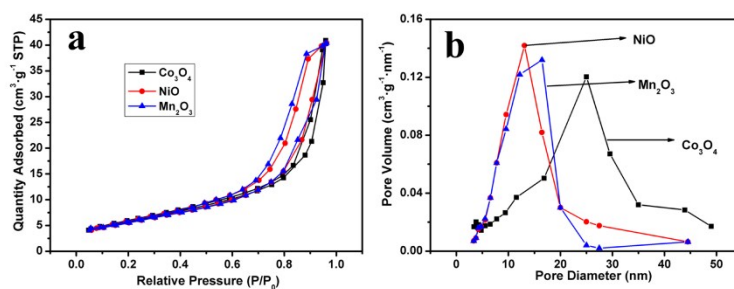

Fig. S1 N<sub>2</sub> adsorption-desorption isotherms for Co<sub>3</sub>O<sub>4</sub>, NiO and Mn<sub>2</sub>O<sub>3</sub> hollow core-shell microspheres calcined at 500 °C (a) and their corresponding pore size distribution plots (b).

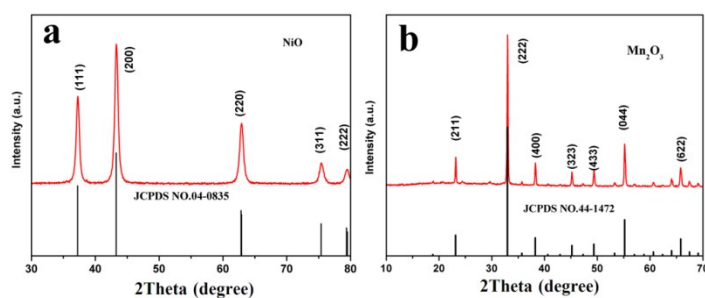

Fig. S2 The XRD patterns of NiO and Mn<sub>2</sub>O<sub>3</sub> microspheres.

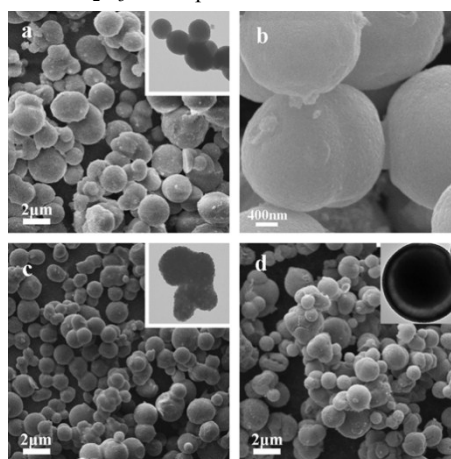

Fig. S3 SEM and TEM images of the Co<sub>3</sub>O<sub>4</sub> precursor (a-b) and those obtained at different calcined temperatures: (c) 300 °C and (d) 400 °C.

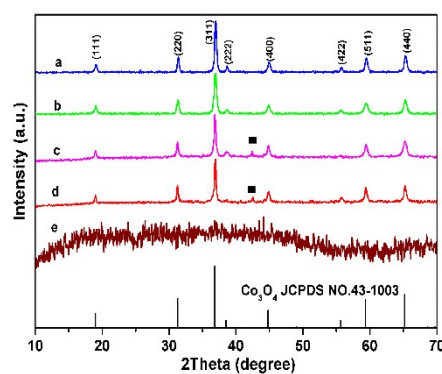

Fig. S4 XRD patterns of patterns of the Co<sub>3</sub>O<sub>4</sub> samples prepared at different calcined temperatures: (a) 600 °C, (b) 500 °C, (c) 400 °C, (d) 300 °C and (e) 200 °C.

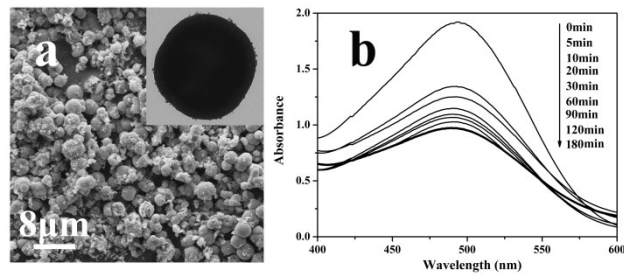

Fig. S5 UV-vis absorption spectra of Congo red in the presence of solid NiO microspheres after different time intervals (a) and adsorption rate of Congo red on solid NiO microspheres (b), initial concentration of Congo red is 60 mg/L.

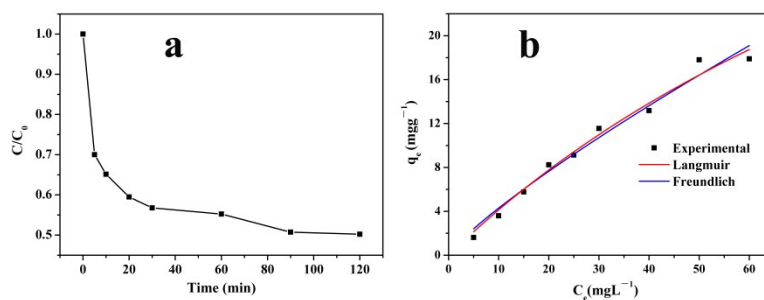

Fig. S6 Adsorption isotherm curves for the adsorption of Congo red onto solid NiO microspheres.

Table S1. Isotherm parameters for the adsorption of Congo red onto NiO hollow core-shell microspheres.

| Isotherm models | Constants                | Value   |
|-----------------|--------------------------|---------|
| Langmuir        | $b/(\text{Lm g}^{-1})$   | 0.0069  |
|                 | $q_m/(\text{mg g}^{-1})$ | 63.7328 |
|                 | $R^2$                    | 0.9815  |
| Freundlich      | $K_f$                    | 0.6299  |
|                 | $n$                      | 1.1999  |
|                 | $R^2$                    | 0.9752  |
